# Supplementary material
Source: Springer Nature journal article supplement (https://www.springermedizin.de/resource/supplementary/12911_2011_624_MOESM3_ESM.pdf/9525928)
Supplement: MOESM3 [file 9525928]

## ISSUE:

Pre-anaesthesia process starts with delay

## BACKGROUND

Surgeon work from morning until evening

Nurse should wait for confirmation from surgeon to prepare OT list

Most of OT lists are ready after 5 pm

## CURRENT CONDITION

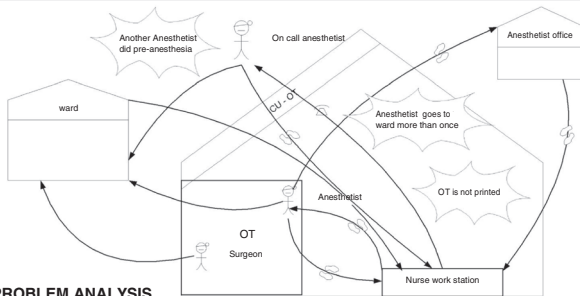

## PROBLEM ANALYSIS

1. Sometimes OT list is not printed

Why? The OT list is not ready to print

Why? Some of the patients name is not confirmed yet

Why? Surgeon does not confirm the patient name for surgery

Why? Surgeon is still busy in OT

Why? Nurse also is not available to inform the anesthetist

2. Anesthetist goes more than once to see nurse at counter to collect OT list

Why? Anesthetist is not sure about time for approved OT list

Why? OT list is not ready the time anesthetist come to collect

Why? Surgeon has not confirm OT list yet

Why? Surgeon is still busy in OT

3. Another Anesthetist came to do pre anaesthesia

Why? The assigned anesthetist came and the list was not ready so he went away to do another work

Then, the anesthetist did not know another anesthetist came and collected the form

Why? Nobody notify him that another anesthetist did the physical check up

## TARGET CONDITION

|      |                   |
|------|-------------------|
| TO   | Clinical Director |
|      | HOD anesthesia    |
| DATE | July 2011         |

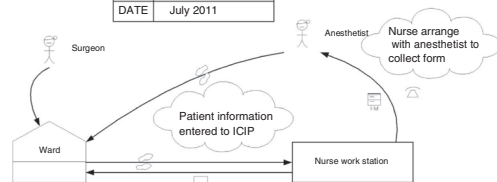

## COUNTERMEASURES

1. Number of pre-anaesthesia list modifications
2. Number of list cancellation
3. Number of new emergency list

## IMPLEMENTATION PLAN

| What                                | Who               | Duration      | Outcome                                 |
|-------------------------------------|-------------------|---------------|-----------------------------------------|
| Inform staff about target condition | HOD anesthesia    | 0.5 hour      | Reduce transportation waste             |
| Education of the staff              | Clinical Director | 0.5 hour      | Learn new process and work with ICIP    |
| New workflow implementation         | HOD anesthesia    | 1 working day | Remove waiting and transportation waste |

## FOLLOW UP

|                                  |                    |
|----------------------------------|--------------------|
| Cost                             | \$\$\$             |
| Man/hour                         | \$\$\$             |
| Benefit                          | \$\$\$             |
| Reduce waste time of anesthetist | Intangible benefit |
| Improve time to patient care     | Intangible benefit |

## TEST

Monitor attendance of staff in training

Monitor the new workflow and participant in new process which includes anaesthetist, nurse and surgeon

Review the run chart for time, steps and number of list modification, cancellation and emergency list
